# Supplementary material
Source: MDPI journal article supplement (https://www.mdpi.com/1424-2818/11/10/197)
Supplement: s1 [file s1]

Supplemental Materials

Table S1 Specific information on the sampling sites

| Site | Location             | Longitude and Latitude                | Altitude (above the sea level) |
|------|----------------------|---------------------------------------|--------------------------------|
| A    | Banan, Chongqing     | 29°61'N, 106°55'E – 29°65'N, 106°59'E | 155 – 175 m                    |
| B    | Fuling, Chongqing    | 29°75'N, 107°37'E – 29°79'N, 107°43'E | 155 – 175 m                    |
| C    | Zhongxian, Chongqing | 30°32'N, 108°14'E – 30°36'N, 108°22'E | 155 – 175 m                    |

**Table S2** Relative abundance of arbuscular mycorrhizal fungi (AMF) taxa in the rhizosphere soils of *Cynodon dactylon* in three contrasting land use types along the drawdown zone of the Three Gorges Reservoir

[illegible]

[illegible]

|             |                                   |      |       |       |      |       |       |       |       |       |       |       |       |      |      |
|-------------|-----------------------------------|------|-------|-------|------|-------|-------|-------|-------|-------|-------|-------|-------|------|------|
| <b>Par1</b> | <b><i>Paraglomus occultum</i></b> | –    | –     | –     | 4.96 | –     | –     | –     | –     | 0.001 | –     | –     | –     | –    | –    |
| <b>Par2</b> | <b><i>Paraglomus</i> sp.</b>      | –    | 0.04  | 0.001 | 8.01 | 0.04  | –     | –     | –     | –     | –     | –     | –     | –    | –    |
| <b>Par3</b> | <b><i>Paraglomerale</i> sp.</b>   | 5.28 | 22.81 | 2.16  | 3.65 | 12.41 | –     | –     | –     | 0.001 | –     | –     | –     | –    | –    |
|             | <b>Unkonwn</b>                    |      |       |       |      |       |       |       |       |       |       |       |       |      |      |
| <b>Un1</b>  | <b><i>Glomeraceae</i> sp.</b>     | 0.50 | 23.36 | 7.31  | 7.40 | 12.36 | 75.52 | 14.93 | –     | 6.23  | 12.26 | 32.98 | 25.73 | 5.88 | 1.20 |
| <b>Un2</b>  | <b><i>Glomerales</i> sp.</b>      | –    | 0.002 | –     | –    | 5.73  | –     | 29.34 | 36.17 | –     | 31.36 | 0.15  | 0.62  | 3.43 | 3.62 |

Abbreviations: NCND, non-cultivated non-disturbed land; DNC, disturbed non-cultivated land; CL, cultivated land. CL1, *Cynodon dactylon* from CL; CL2, *C. dactylon* from CL; CL3, *C. dactylon* from NCL; CL4, *C. dactylon* from NCL; CL5, *C. dactylon* from NCL; DNC1, *C. dactylon* from DNC; DNC2, *C. dactylon* from DNC; DNC3, *C. dactylon* from DNC; DNC4, *C. dactylon* from DNC; NCND1, *C. dactylon* from NCND; NCND2, *C. dactylon* from NCND; NCND3, *C. dactylon* from NCND; NCND4, *C. dactylon* from NCND; NCND5, *C. dactylon* from NCND. <sup>a</sup> DNC5: no hint obtained after the NGS sequencing.

**Table S3** Relative abundance (%) of arbuscular mycorrhizal fungi (AMF) taxa in roots associated with *Cynodon dactylon* grown in three contrasting land use types along the drawdown zone of the Three Gorges Reservoir

|      |                                 | Non-cultivated Non-disturbed land<br>(NCND) |       |       | Disturbed non-cultivated<br>land (DNC) |      |      | Cultivated land (CL) |      |       |
|------|---------------------------------|---------------------------------------------|-------|-------|----------------------------------------|------|------|----------------------|------|-------|
|      |                                 | NCND1                                       | NCND2 | NCND3 | DNC1                                   | DNC2 | DNC3 | CL1                  | CL2  | CL3   |
|      | <b><i>Archaeospora</i></b>      |                                             |       |       |                                        |      |      |                      |      |       |
| Arc1 | <i>Archaeosporaceae</i> sp.     | –                                           | –     | –     | 82.70                                  | –    | –    | –                    | –    | 0.004 |
|      | <b><i>Claroideoglomus</i></b>   |                                             |       |       |                                        |      |      |                      |      |       |
| Cla2 | <i>Claroideoglomus walkeri</i>  |                                             |       |       |                                        | 0.65 |      |                      |      |       |
| Cla3 | <i>Claroideoglomus</i> sp.      | –                                           | –     | 0.003 | –                                      | 0.10 | –    | –                    | –    | 0.003 |
| Cla4 | <i>Claroideoglomeraceae</i> sp. | –                                           | –     | –     | 0.02                                   | –    | –    | –                    | –    | –     |
|      | <b><i>Diversispora</i></b>      |                                             |       |       |                                        |      |      |                      |      |       |
| Div2 | <i>Diversispora</i> sp.         |                                             |       |       |                                        | 0.22 |      |                      |      |       |
| Div3 | <i>Diversisporaceae</i> sp.     |                                             |       |       |                                        | 0.21 |      |                      |      |       |
|      | <b><i>Funneliformis</i></b>     |                                             |       |       |                                        |      |      |                      |      |       |
| Fun1 | <i>Funneliformis mosseae</i>    | –                                           | 0.004 | –     | –                                      | 3.49 | –    | –                    | 0.05 | –     |
|      | <b><i>Glomus</i></b>            |                                             |       |       |                                        |      |      |                      |      |       |
| Glo1 | <i>Glomus aggregatum</i>        | –                                           | –     | –     | –                                      | –    | –    | –                    | –    | 0.14  |
| Glo2 | <i>Glomus cubense</i>           | –                                           | –     | –     | –                                      | –    | –    | 0.61                 | –    | –     |
| Glo3 | <i>Glomus indicum</i>           | –                                           | –     | –     | –                                      | –    | –    | –                    | –    | 0.034 |
| Glo5 | <i>Glomus microcarpum</i>       | –                                           | –     | –     | –                                      | –    | –    | –                    | –    | 0.20  |
| Glo6 | <i>Glomus versiforme</i>        | –                                           | –     | –     | –                                      | –    | 0.07 | –                    | –    | –     |
| Glo7 | <i>Glomus</i> sp.               | –                                           | –     | –     | –                                      | –    | –    |                      | 1.88 | 0.08  |
| Glo8 | <i>Glomus</i> sp. 7 SUN_2011    | 12.15                                       | –     | –     | 5.79                                   | –    | –    | –                    | –    | 16.31 |
| Glo9 | <i>Glomus</i> sp. 8 SUN_2011    | –                                           | 15.55 | –     | –                                      | –    | –    | 20.74                |      | 0.006 |

|              |                                        |       |       |       |       |       |       |      |       |       |
|--------------|----------------------------------------|-------|-------|-------|-------|-------|-------|------|-------|-------|
| <b>Glo10</b> | <b><i>Glomus</i> sp. U31</b>           | –     | 0.02  | –     | –     | –     | –     | –    | –     | 0.50  |
| <b>Glo11</b> | <b><i>Glomus</i> sp. 0502</b>          | –     | 0.07  | –     | –     | –     | –     | –    | –     | –     |
|              | <b><i>Rhizophagus</i></b>              |       |       |       |       |       |       |      |       |       |
| <b>Rhi1</b>  | <b><i>Rhizophagus custos</i></b>       |       |       |       |       | 4.07  |       |      |       |       |
| <b>Rhi2</b>  | <b><i>Rhizophagus fasciculatus</i></b> | –     | –     | –     | –     | –     | –     | –    | 0.85  | 0.04  |
| <b>Rhi3</b>  | <b><i>Rhizophagus intraradices</i></b> | 31.98 | 0.27  | 85.88 | –     | 28.94 | –     | –    | 37.40 | 3.23  |
| <b>Rhi4</b>  | <b><i>Rhizophagus irregularis</i></b>  | –     | 53.28 | 4.70  | –     | 3.99  | 23.78 | 0.38 | 2.46  | 1.33  |
| <b>Rhi5</b>  | <b><i>Rhizophagus</i> sp.</b>          | 12.55 | 10.11 |       | –     | 0.57  | 65.04 | 1.83 | –     | 14.18 |
|              | <b><i>Septoglmus</i></b>               |       |       |       |       |       |       |      |       |       |
| <b>Sep1</b>  | <b><i>Septoglomus viscosum</i></b>     | –     | –     | 0.02  | –     | –     | –     | 0.02 | 0.48  | 0.50  |
|              | <b><i>Paraglomus</i></b>               |       |       |       |       |       |       |      |       |       |
| <b>Par3</b>  | <b><i>Paraglomerale</i> sp.</b>        | 1.21  | 0.36  | 0.09  | –     | 0.001 | –     | –    | 0.001 | 0.006 |
|              | <b>Unknown</b>                         |       |       |       |       |       |       |      |       |       |
| <b>Un1</b>   | <b><i>Glomeraceae</i> sp.</b>          | 2.83  | 12.97 | 1.15  | 11.40 | 9.38  | –     | 0.96 | 6.33  | 37.92 |
| <b>Un2</b>   | <b><i>Glomerales</i> sp.</b>           | –     | 5.40  | –     | 0.10  | –     | –     | –    | –     | 2.70  |

Abbreviations: NCND, non-cultivated non-disturbed land; DNC, disturbed non-cultivated land; CL, cultivated land. CL1, *Cynodon dactylon* from CL; CL2, *C. dactylon* from CL; CL3, *C. dactylon* from NCL; DNC1, *C. dactylon* from DNC; DNC2, *C. dactylon* from DNC; DNC3, *C. dactylon* from DNC; NCND1, *C. dactylon* from NCND; NCND2, *C. dactylon* from NCND; NCND3, *C. dactylon* from NCND.

**Table S4** Correlation coefficient between arbuscular mycorrhizal fungi (AMF) community composition and environmental variables (soil chemical characteristics and land-use type) from axes 1 and 2 of ordination

| Correlation | Rhizosphere soil |              | Root         |              |
|-------------|------------------|--------------|--------------|--------------|
|             | $R^2$            | $P$          | $R^2$        | $P$          |
| AK          | 0.266            | 0.181        | 0.518        | 0.118        |
| AP          | 0.130            | 0.458        | 0.198        | 0.510        |
| C/N         | 0.058            | 0.732        | 0.187        | 0.510        |
| EC          | 0.032            | 0.853        | 0.282        | 0.383        |
| LU          | <b>0.497</b>     | <b>0.024</b> | 0.608        | 0.056        |
| pH          | 0.208            | 0.277        | 0.435        | 0.188        |
| SM          | 0.389            | 0.074        | <b>0.846</b> | <b>0.005</b> |
| SOC         | <b>0.654</b>     | <b>0.005</b> | <b>0.915</b> | <b>0.001</b> |
| SOM         | <b>0.654</b>     | <b>0.005</b> | <b>0.915</b> | <b>0.001</b> |
| TN          | 0.018            | 0.923        | 0.168        | 0.551        |

Values in bold indicate significant correlations ( $P < 0.05$ ). Abbreviations: bold data, significant correlation; AK, available potassium; AP, available phosphorus; C/N, carbon and nitrogen ratio; EC, soil electrical conductivity; LU, land-use type; pH, soil pH; SM, soil moisture; SOC, soil organic carbon; SOM, soil organic matter; TN, total nitrogen.

**Table S5** Permutational multivariate analysis of variance (PERMANOVA) exploring the differences in arbuscular mycorrhizal fungi (AMF) community structure among constrasting land-use types

| Rhizosphere soil and root |                 |          |                 | Rhizosphere soil |          |                 | Root            |          |                 |
|---------------------------|-----------------|----------|-----------------|------------------|----------|-----------------|-----------------|----------|-----------------|
| Tested factor             | Df              | Pseudo-F | <i>P</i> (perm) | Df               | Pseudo-F | <i>P</i> (perm) | Df              | Pseudo-F | <i>P</i> (perm) |
| Land-use type             | 1               | 1.32     | 0.023           | 1                | 2.01     | 0.001           | 1               | 1.14     | 0.168           |
| PERMDISP                  | <i>P</i> (perm) |          |                 | <i>P</i> (perm)  |          |                 | <i>P</i> (perm) |          |                 |
| Land-use type             | 0.854           |          |                 | 0.528            |          |                 | 0.817           |          |                 |

Note: Values represent the pseudo-F ratio (*F*) and the level of significance (*P*).



**Table S6** The number of sequencing reads from each fungal phylum detected for all rhizosphere soil or root samples among three contrasting land-use types

|                        | Rhizosphere  |               |               | Root          |               |              |
|------------------------|--------------|---------------|---------------|---------------|---------------|--------------|
|                        | NCND         | DNC           | CL            | NCND          | DNC           | CL           |
| <i>Glomeromycota</i>   | 58553 ± 7508 | 46590 ± 16495 | 43472 ± 14969 | 38182 ± 27702 | 47062 ± 24950 | 75794 ± 2989 |
| <i>Chytridiomycota</i> | 3928 ± 1346  | 2 ± 1         | 40 ± 30       | 127 ± 117     | 19 ± 14       | 49 ± 48      |
| <i>Ascomycota</i>      | 908 ± 256    | 664 ± 540     | 11409 ± 11221 | 3181 ± 1212   | 50305 ± 47002 | 394 ± 24     |
| <i>Zygomycota</i>      | 2573 ± 1518  | 40484 ± 25439 | 15428 ± 8214  | 3 ± 3         | 5258 ± 5247   | 5 ± 1        |
| <i>Basidiomycota</i>   | 1688 ± 594   | 145 ± 105     | 961 ± 266     | 5538 ± 4546   | 3352 ± 1672   | 33 ± 13      |

Data expressed as mean ± SE (n = 5 for rhizosphere, n = 3 for root). NCND, non-cultivated non-disturbed land; DNC, disturbed non-cultivated land; CL, cultivated land. The proportional distributions of the sequences from each fungal phylum detected in all rhizosphere soil and root samples.

**Table S7** The PCR primers sequences in this study

| The first round PCR primer  |                             |                |                             |
|-----------------------------|-----------------------------|----------------|-----------------------------|
| <b>SSUmAf</b>               | Nucleotide sequence (5'–3') | <b>LSUmAr</b>  | Nucleotide sequence (5'–3') |
| <b>SSUmAf1</b>              | TGGGTAATCTTTTGAAACTTYA      | <b>LSUmAr1</b> | GCTCACACTCAAATCTATCAAA      |
| <b>SSUmAf2</b>              | TGGGTAATCTTRTGAAACTTCA      | <b>LSUmAr2</b> | GCTCTAACTCAATTCTATCGAT      |
|                             |                             | <b>LSUmAr3</b> | TGCTCTTACTCAAATCTATCAAA     |
|                             |                             | <b>LSUmAr4</b> | GCTCTTACTCAAACCTATCGA       |
| The second round PCR primer |                             |                |                             |
|                             | Nucleotide sequence (5'–3') |                | Nucleotide sequence (5'–3') |
| <b>ITS70</b>                | GTGARTCATCGAATCTTTG-3'      | <b>ITS4</b>    | TCCTCCGCTTATTGATATGC        |

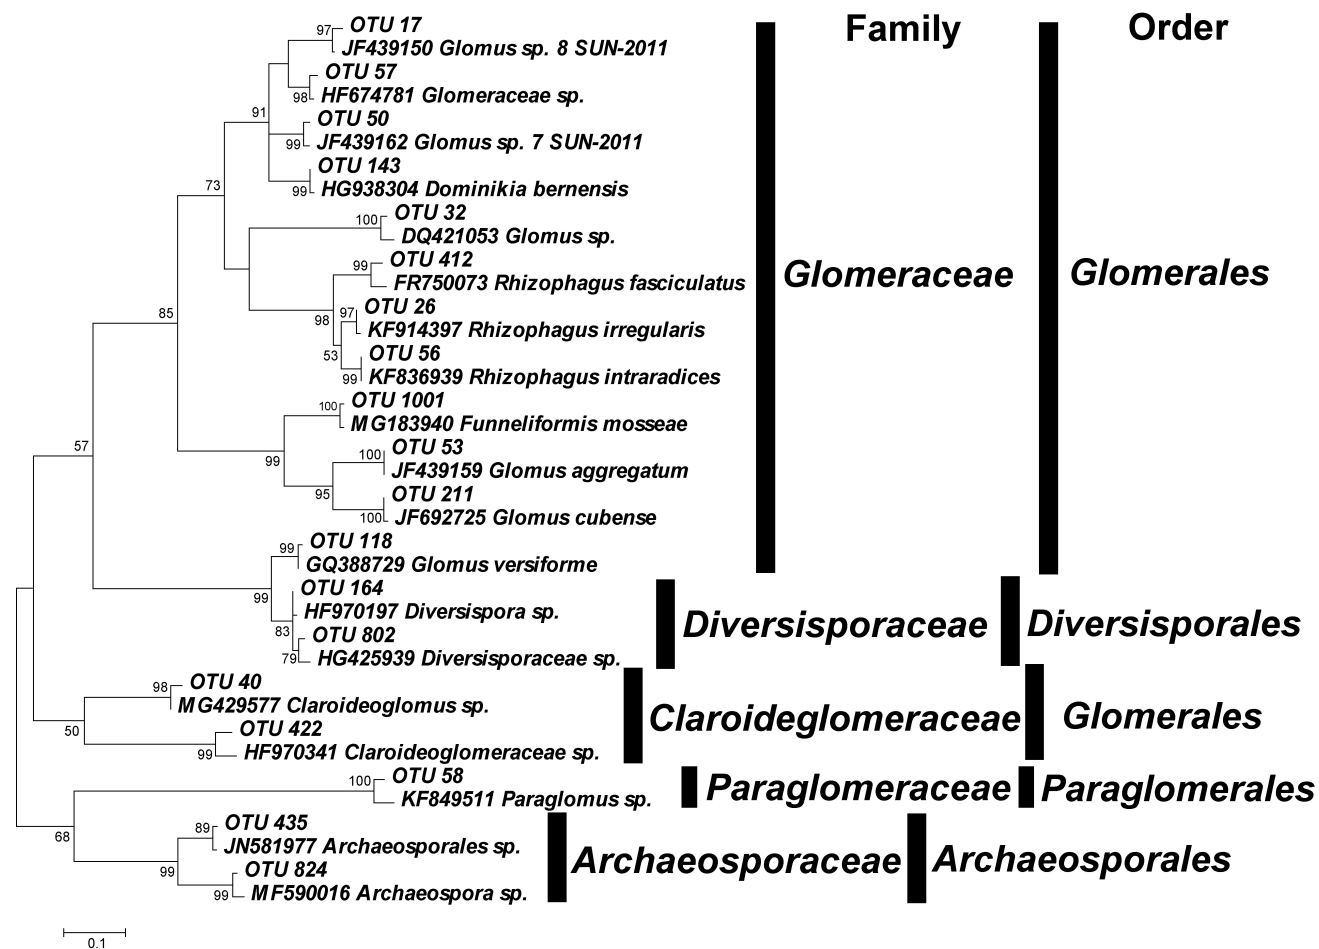

**Figure S1** Neighbor-joining phylogenetic tree (Maximum Likelihood method) showing the relationships of the representative sequences of OTUs and the reference sequences from GenBank and UNITE. The DNA fragment of AMF were obtained from *Cynodon dactylon* roots and rhizosphere soils from three contrasting land-use types. The values above the branches are bootstrap values (1,000 replicates).

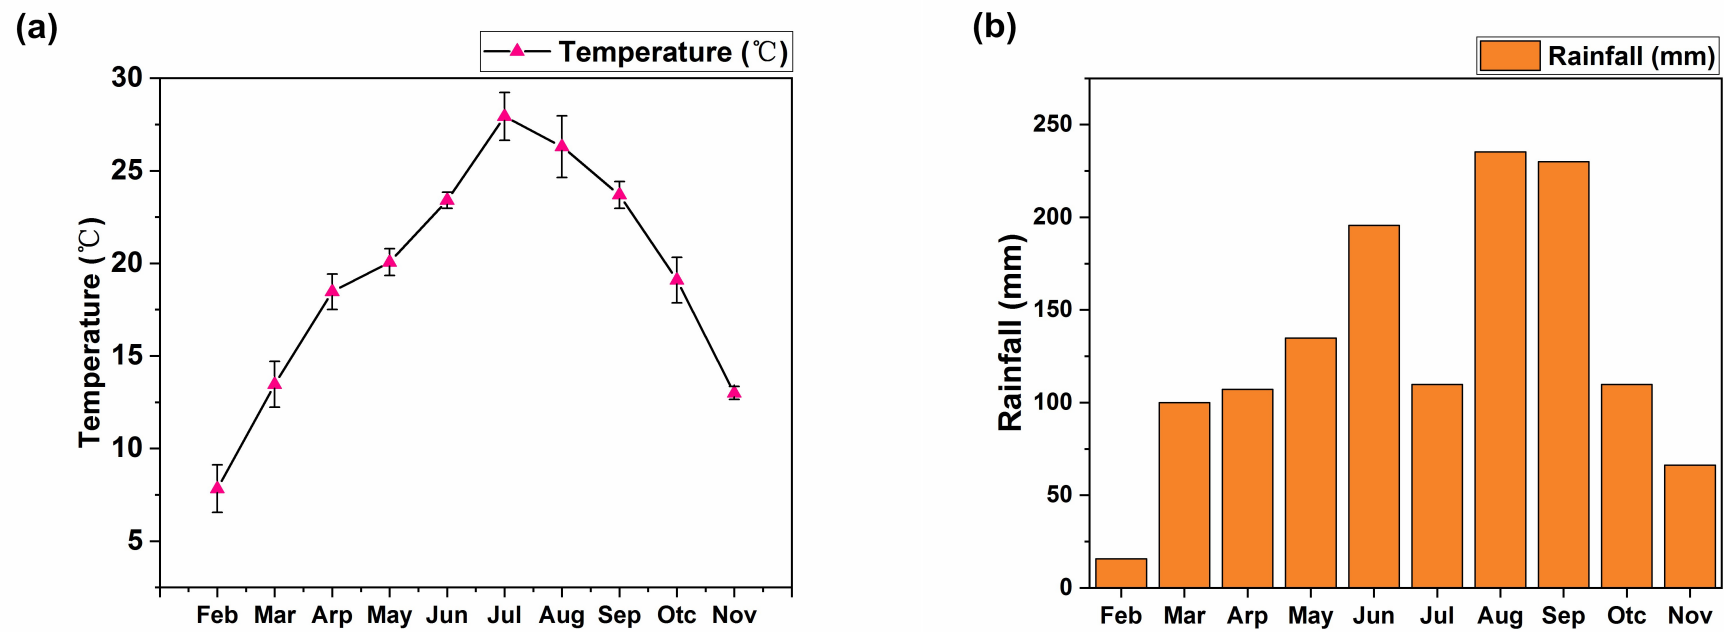

**Figure S2** The temperature (a) and rainfall (b) of the sampling sites in the Three Gorges Reservoir from Feb (February ) to Nov (November) in 2014.
